# Supplementary material for: In Vitro Monitoring of Human T Cell Responses to Skin Sensitizing Chemicals—A Systematic Review
Source: MDPI journal article supplement (doi:10.3390/cells11010083), 2021-12-28
Supplement: s1 [file s1]

**Table S1.** Pubmed search results.

| #  | Search History                                                                                                                                                                                                                                                                                                                     | Results |
|----|------------------------------------------------------------------------------------------------------------------------------------------------------------------------------------------------------------------------------------------------------------------------------------------------------------------------------------|---------|
| #1 | ("t-lymphocytes"[MeSH Terms] AND ("2001/01/01 00:00":"3000/01/01 05:00"[Date - Publication] AND "journal article"[Publication Type] NOT review[Filter]))                                                                                                                                                                           | 169,883 |
| #2 | ((("dermatitis, allergic contact"[MeSH Terms] OR "chemical allergen"[Title/Abstract] OR "chemical allergens"[Title/Abstract] OR ("hypersensitivity"[Title/Abstract] AND "dermatitis"[Title/Abstract])) AND ("2001/01/01 00:00":"3000/01/01 05:00"[Date - Publication] AND "journal article"[Publication Type] NOT review[Filter])) | 6,748   |
| #3 | #1 AND #2                                                                                                                                                                                                                                                                                                                          | 445     |
| #4 | #3 AND English[lang]                                                                                                                                                                                                                                                                                                               | 429     |
| #5 | #4 AND (human[All Fields])                                                                                                                                                                                                                                                                                                         | 238     |
