# Supplementary material for: In Vitro Monitoring of Human T Cell Responses to Skin Sensitizing Chemicals—A Systematic Review
Source: MDPI journal article supplement (doi:10.3390/cells11010083), 2021-12-28
Supplement: s1 [file s1]

**Table S3.** Studies describing general effects of non-metallic chemical allergens on T cell function.

| References                 | Chemicals                    | Read-out                                       | Experimental system                                                                   | Patients | Remarks                                                                                                                                                               |
|----------------------------|------------------------------|------------------------------------------------|---------------------------------------------------------------------------------------|----------|-----------------------------------------------------------------------------------------------------------------------------------------------------------------------|
| <b>Hou, 2020 [79]</b>      | 2-Mercaptobenzothiazole      | CD69 relative fluorescence intensity           | Jurkat clone E6-1<br>human T lymphocyte cell line                                     | no       | Cell viability >50% confirmed<br>Jurkat T cells only express one TCR<br>CD69 as T cell activation marker can be upregulated TCR-independently (Frentsch et al., 2005) |
|                            | 2-Methoxy-4-methylphenol     |                                                |                                                                                       |          |                                                                                                                                                                       |
|                            | 4-Methylaminophenol sulfate  |                                                |                                                                                       |          |                                                                                                                                                                       |
|                            | 4-Nitrobenzyl bromide        |                                                |                                                                                       |          |                                                                                                                                                                       |
|                            | Benzo[a]pyrene               |                                                |                                                                                       |          |                                                                                                                                                                       |
|                            | Cyclamen aldehyde            |                                                |                                                                                       |          |                                                                                                                                                                       |
|                            | Diethyl maleate              |                                                |                                                                                       |          |                                                                                                                                                                       |
|                            | DNCB                         |                                                |                                                                                       |          |                                                                                                                                                                       |
|                            | Ethyl acrylate               |                                                |                                                                                       |          |                                                                                                                                                                       |
|                            | Eugenol                      |                                                |                                                                                       |          |                                                                                                                                                                       |
|                            | Formaldehyde                 |                                                |                                                                                       |          |                                                                                                                                                                       |
|                            | Glutaraldehyde               |                                                |                                                                                       |          |                                                                                                                                                                       |
|                            | Glyoxal                      |                                                |                                                                                       |          |                                                                                                                                                                       |
|                            | Hexyl cinnamic aldehyde      |                                                |                                                                                       |          |                                                                                                                                                                       |
|                            | Hydroxycitronellal           |                                                |                                                                                       |          |                                                                                                                                                                       |
|                            | Imidazolidinyl urea          |                                                |                                                                                       |          |                                                                                                                                                                       |
|                            | Linalool                     |                                                |                                                                                       |          |                                                                                                                                                                       |
|                            | m-Aminophenol                |                                                |                                                                                       |          |                                                                                                                                                                       |
|                            | p-Benzoquinone               |                                                |                                                                                       |          |                                                                                                                                                                       |
|                            | Phenyl benzoate              |                                                |                                                                                       |          |                                                                                                                                                                       |
|                            | PPD                          |                                                |                                                                                       |          |                                                                                                                                                                       |
|                            | Resorcinol                   |                                                |                                                                                       |          |                                                                                                                                                                       |
|                            | Tetramethylthiuram disulfide |                                                |                                                                                       |          |                                                                                                                                                                       |
|                            | trans-Cinnamaldehyde         |                                                |                                                                                       |          |                                                                                                                                                                       |
| <b>Clouet, 2019 [82]</b>   | Cinnamaldehyde               | T cell proliferation detected by CSFE dilution | THP-1 cell line<br>allogeneic CD4+ T cells from PBMC coculture                        | no       | Mixed lymphocyte reaction (non-autologous system)                                                                                                                     |
|                            | Eugenol                      |                                                |                                                                                       |          |                                                                                                                                                                       |
|                            | Farnesol                     |                                                |                                                                                       |          |                                                                                                                                                                       |
|                            | Geraniol                     |                                                |                                                                                       |          |                                                                                                                                                                       |
|                            | MI                           |                                                |                                                                                       |          |                                                                                                                                                                       |
|                            | Resorcinol                   |                                                |                                                                                       |          |                                                                                                                                                                       |
| <b>Frombach, 2018 [78]</b> | 2-Mercaptobenzothiazole      | IL-23R /CD119, CD44 and CD124                  | Primary human keratinocytes, moDCs and non-autologous lymphocytes from PBMC coculture | no       | Mixed lymphocyte reaction (non-autologous system)                                                                                                                     |
|                            | DNCB                         | expression                                     |                                                                                       |          |                                                                                                                                                                       |
|                            | PPD                          | IL-4, IL-17 and IFN- $\gamma$ secretion        |                                                                                       |          |                                                                                                                                                                       |

|                              |              |                                          |                                                      |                                                                                                                                                                     |                                                                                                                                    |
|------------------------------|--------------|------------------------------------------|------------------------------------------------------|---------------------------------------------------------------------------------------------------------------------------------------------------------------------|------------------------------------------------------------------------------------------------------------------------------------|
| <b>Mai, 2017 [81]</b>        | Formaldehyde | IL-17 and IL-22 expression and secretion | Fresh heparinized blood incubated with PMA-Ionomycin | 104 workers exposed to low-level formaldehyde (19/104 with history of ACD) 90 unexposed controls                                                                    | Immunophenotyping of PMA-Ionomycin stimulated T cells reveals differences in T cell subsets No antigen-specificity assessed        |
| <b>Baló-Banga, 2015 [80]</b> | Clindamycin  | IL-6 secretion                           | IL-6 solid phase immunoassay in PBMC                 | Analysis of heterogeneous patient groups by different in vivo diagnostic tests to complement in vitro testing Specific results of IL-6 release only for one patient | 20 minutes drug incubation of PBMC in tubes (suspension culture); little direct contact expected between T cells and potential APC |

ACD, allergic contact dermatitis; APC, antigen presenting cells; CD, cluster of differentiation; CSFE, carboxyfluorescein diacetate succinimidyl ester; DNCB, 2,4-Dinitrochlorobenzene; DNFB, 1-Fluoro-2,4-dinitrobenzene; IFN, interferon; IL, interleukin; MI, Methylisothiazolinone; moDCs, monocytes-derived dendritic cells; PBMC, peripheral blood mononuclear cells; PMA, phytohemagglutinin; PPD, *p*-Phenylenediamine; TCR, T cell receptor.

Additional reference:

Frentsch, M., Arbach, O., Kirchhoff, D., Moewes, B., Worm, M., Rothe, M., Scheffold, A., and Thiel, A. (2005). Direct access to CD4+ T cells specific for defined antigens according to CD154 expression. *Nat Med* 11, 1118-1124.
