# Supplementary material for: In Vitro Monitoring of Human T Cell Responses to Skin Sensitizing Chemicals—A Systematic Review
Source: Cells. 2021 Dec 28;11(1):83. doi: 10.3390/cells11010083 (PMC8750770; doi:10.3390/cells11010083)
Supplement: Supplementary file 1 [file cells-11-00083-s001.zip › Table S2.xlsx]

## Sheet: Table S2
Table S2. Chemicals allergens showing in vitro antigen-specific T cell activation in the different reviewed studies (extension of Table 1).
For each chemical and study, experimental details are listed. The score indicates the sum of experimental evidence within the reviewed studies for an antigen-specific T cell activation by a given chemical, i.e. the score is not referring to individual studies (see methods section 2.4).
Abbreviations. ACD: allergic contact dermatitis; AD: atopic dermatitis; Ag: antigen; APC: antigen presenting cells; BB: Bandrowski's base; CD: cluster of differentiation; CLA: cutaneous lymphocyte antigen; CSFE: carboxyfluorescein diacetate succinimidyl ester; DC: dendritic cells; DNBS: 2,4-Dinitrobenzenesulfonic acid; DNCB: 2,4-Dinitrochlorobenzene; DNFB: 1-Fluoro-2,4-dinitrobenzene; DPCP: diphe…
Chemical	Reference	Score	Chemical concentration used in the study	Chemical concentration [µM]	APC	Epitope generation	T cell source	Read-outs	Assays and techniques	T cell subsets	Human donors / patient cohorts	Results and remarks
DNFB	Banerjee, 2003	+	0.1 - 1- 10 - 100 mg/L	0.53 - 5.3 - 53 - 537 μM	PBMC	Direct administration	PBMC	Proliferation Cytokine production	MTT ELISA (IL-1α, IL-1β)	-	Healthy non-atopic donors	Increased cell proliferation in the presence of chemical sensitizer and concanavalin A, increased IL-1α and IL-1β secretion and IL-2 expression.
Isoeugenol	Banerjee, 2003	+	0.1 - 1 - 10 - 100 mg/L	0.61 - 6.1- 61 - 609 μM	PBMC	Direct administration	PBMC	Proliferation Cytokine production Gene expression (IL-2)	MTT ELISA (IL-1α, IL-1β) RT-PCR (IL-2)	-	Healthy non-atopic donors	Increased cell proliferation in the presence of chemical sensitizer and concanavalin A, increased IL-1α and IL-1β secretion and IL-2 expression.
DNCB	Betts, 2017	++	6 µM	6 µM	THP-1 C1R cells MoDC	Modification (pulsed APC)	T cell clones	Cytokine production (GM-CSF, IFN-g, ...) T cell phenotype (CD69)	ELISA, Luminex Flow cytometry	-	Healthy donors	Sensitizer stimulate production of endogenous lipid ligands leading to increased autoreactive T cell activation. Cytokine secretion by T cells was contact-dependent (with APC), dose-dependent T cell surface upregulation of CD69, anti-CD1 blocking abrogated cytokine secretion.
PPD	Bordignon, 2015	+++	10 µM	10 µM	PBMC	Direct administration	PBMC	Cytokine production (IFN-γ , IL-10)	ELISpot	-	Patient cohort: 8 PPD-allergic, 23 non-allergic (patch testing) Sample collection: 48 h after patch testing	IFN-γ associated with positive patch testing results and symptoms. Subjects with a history of PPD exposure, no symptons and negative patch test had IL-10 response. Non-allergic donors without history of PPD exposure produced no IFN-γ and no IL-10. Concordance between the different cytokine profiles (ELISpot) and patch test results, no false positive for the different cytokine profiles induced by …
SADBE	Camouse, 2008	+	1 mM	1000 μM	mature MoDC	Modification (pulsed APC)	PBMC	Proliferation	T-cell/DC cocultures LPT with thymidine incorporation	-	Patient cohort: 40 SADBE sensitized individuals Sample collection: 2 weeks after sensitization before elicitation, 10 months after elicitation	Increased T cell proliferation in 3 subjects from the high-dose group and 2 subjects from the low-dose group after 10 months. No antigen-specific T cell response detected 2 weeks after sensitization but at a later time point (2 weeks and 10 months after elicitation).
Fragrance mix	Cortial, 2015	++	0.01 to 250 μg/mL		PBMC	Direct administration	PBMC	Proliferation Cytokine production	LTT with thymidine incorporation ELISA	-	Patient cohort: 20 fragrance-mix-allergic, 11 non-allergic (patch testing)	Increased T cell proliferation in 10/20 positive patch test patients, increased TNF-α and IFN-γ secretion in some positive patch tested patients.
PPD	Coulter, 2007	+++	50 μM	50 μM	immature MoDC	Modification (pulsed APC)	PBMC	Proliferation	Mixed lymphocyte reaction LTT with thymidine incorporation	-		Increased proliferation of allogenic T-cells (mixed lymphocyte reaction).
BB	Coulter, 2010	+++	0.1 - 20 µM	0.1 - 20 µM	PBMC immature MoDC	Direct administration	PBMC	Proliferation Cytokine production Gene expression	LTT with thymidine incorporation ELISA Microarray qRT-PCR	CD4+, CD8+ T cells	Patient cohort: (1) 5 PPD-allergic, 6 non-allergic (patch testing) (2) 10 PPD-allergic, 10 non-allergic (patch testing)	(1) Increased T cell proliferation in allergic patients upon both PPD and BB stimulation, no response in tolerant individuals. Increased cytokine secretion in allergic indiiduals after PPD or BB stimulation. Gene expression analysis: Principal Component Analysis (PCA) can discriminate between allergics and tolerant patients; increased expression of Th2-related genes. Increased proliferation of CD…
PPD	Coulter, 2010	+++	0.1 - 20 µM	0.1 - 20 µM	PBMC immature MoDC	Direct administration	PBMC	Proliferation Cytokine production Gene expression	LTT with thymidine incorporation ELISA Microarray qRT-PCR	CD4+, CD8+ T cells	Patient cohort: (1) 5 PPD-allergic, 6 non-allergic (patch testing) (2) 10 PPD-allergic, 10 non-allergic (patch testing)	(1) Increased T cell proliferation in allergic patients upon both PPD and BB stimulation, no response in tolerant individuals. Increased cytokine secretion in allergic indiiduals after PPD or BB stimulation. Gene expression analysis: Principal Component Analysis (PCA) can discriminate between allergics and tolerant patients; increased expression of Th2-related genes. Increased proliferation of CD…
DPCP	Friedmann, 2017	+	2 - 128 µM	2 - 128 µM	PBMC	Direct administration	PBMC	Proliferation	LTT with thymidine incorporation Flow cytometry	CD4+, CD8+ T cells	Patient cohort: 20 DPCP sensitized individuals (patch testing)	Positive lymphocyte proliferative response at 12 - 64 µM, peak at 16 - 32 µM DPCP (8 subjects). A dominant proliferative response (Ki67 expression) was observed mainly in CD8+ T cells, while it was minimal in CD4+ T cells (2 subjects investigated).
BB	Gibson, 2015	+++	LTT: 2 - 10 μM Priming: 5 μM T cell activation and ELISpot: 1 - 8 μM Clone generation: 5 μM Clone restimulation: 3 - 5 μM	LTT: 2 - 10 μM Priming: 5 μM T cell activation and ELISpot: 1 - 8 μM Clone generation: 5 μM Clone restimulation: 3 - 5 μM	mature MoDC EBV-transformed B-cells (for clone experiments)	Direct administration Modification (pulsed APC)	PBMC	Proliferation Cytokine production T cell clone proliferation T cell clone cytokine production	LTT with thymidine incorporation T cell priming assay T cell clone restimulation	Memory and naive T cells	Patient cohort: 5 PPD-allergic (patch testing), non-allergic (without history of PPD allergy)	PPD allergic individuals: increased T cell proliferation, 25% of PPD-specific T cell clone were cross-reactive to BB, >90% BB-specific T cell clones did not respond to PPD. Increased IFN-γ, IL-13 and IL-22 secretion in T cell clones after antigen-specific re-stimulation. Healthy donors: absence of T cell proliferation and cytokine secretion in PPD-primed T cells; increased T cell proliferation an…
PPD	Gibson, 2015	+++	LTT: 2 - 10 μM Priming: 1, 5, 10 and 30 μM T cell activation and ELISpot: 1 - 8 μM T cell clone generation: 5 μM T cell clone proliferation: 3 - 5 μM	LTT: 2 - 10 μM Priming: 5 μM T cell activation and ELISpot: 1 - 8 μM Clone generation: 5 μM Clone restimulation: 3 - 5 μM	mature MoDC EBV-transformed B-cells (for clone experiments)	Direct administration Modification (pulsed APC)	PBMC	Proliferation T cell clones Cellular markers HLA blocking Cytokine production	LTT with thymidine incorporation T cell priming assay T cell clone restimulation ELISpot	Memory and naive T cells	Patient cohort: 5 PPD-allergic (patch testing), non-allergic (without history of PPD allergy)	PPD allergic individuals: increased T cell proliferation, 25% of PPD-specific T cell clone were cross-reactive to BB, >90% BB-specific T cell clones did not respond to PPD. Increased IFN-γ, IL-13 and IL-22 secretion in T cell clones after antigen-specific re-stimulation. Healthy donors: absence of T cell proliferation and cytokine secretion in PPD-primed T cells; increased T cell proliferation an…
DNBS	Gildea, 2004	+	1 mM	LTT: 2 - 10 μM Priming: 5 μM T cell activation and ELISpot: 1 - 8 μM Clone generation: 5 μM Clone restimulation: 3 - 5 μM	mature MoDC	Modification (pulsed APC)	PBMC	Proliferation Gene expression	LPT with thymidine incorporation RNA changes by microarray	-	Patient cohort: 1 DNCB-sensitized donor. Sample uptake: after sensitization	Increased T cell proliferation upon incubation of T cells from a DNCB-sensitized individual with DNBS-treated MoDC. Changes in 17 gene expression associated with the stimulation of T lymphocyte responses by DC.
Diltiazem	Girardi, 2005	+	1 µg/mL	2.4 μM	PBMC	Direct administration	PBMC	Proliferation	LPT with thymidine incorporation	-	Patient cohort: 1 diltiazem-allergic, non-allergic (but metronidazol-allergic) (patch testing) Sample collection: 72 h after patch test application	>40% increased proliferative response to diltiazem in the allergic compared to the non-allergic individual.
Metronidazole	Girardi, 2005	+	1 µg/mL	5.8 μM	PBMC	Direct administration	PBMC	Proliferation	LPT with thymidine incorporation	-	Patient cohort: 1 diltiazem-allergic, non-allergic (but metronidazol-allergic) (patch testing) Sample collection: 72 h after patch test application	>40% increased proliferative response to metronidazole in the allergic compared to the non-allergic individual.
Machaerium scleroxylon	Hansel, 2019	+	Ethanolic extracts (1:10, 1:100,1:1000)		PBMC	Direct administration	PBMC	Proliferation T cell activation	LPT with CFSE RT-PCR	-	Patient cohort: 1 M. scleroxylon ethanolic extracts-allergic (patch testing)	Increased CD69 expression detected after stimulation of PBMCwith a 1:10 diluted ethanolic extract for 3 days. Parallel LPT showed the best result at lowest concentration (1:1000 diluted extract).
PPD	Jenkinson, 2009	+++	0.1 - 20 µM	0.1 - 20 µM	PBMC	Direct administration	PBMC	Proliferation	LTT with thymidine incorporation	-	Patients cohort: 10 PPD-allergic (patch testing), non-allergic	Lymphocytes from all 10 PPD-allergic patients, but not from non-allergic donors, proliferated in vitro in the presence of PPD.
PPD	Jenkinson, 2010	+++	2 µg/m 1 mg/ml (PPD-HSA)	18.4 µM	EBV-transformed B cells	Direct administration Protein conjugation (to HSA)	PBMC	Proliferation Cytokine production T cell clone proliferation TCR internalization	LTT with thymidine incorporation ELISA Flow cytometry	CD4+, CD8+, CD4+CD8+ T cells	Patients cohort: 10 PPD-allergic (patch-testing), 10 non-allergic	T cell from allergic patients proliferated at low PPD concentrations. Higher PPD-HSA concentration were required to induce proliferation (but number of PPD equivalents indicated stroger proliferation to PPD-HSA). No response in tolerant individuals. 70 PPD-specific and 10 PPD-HSA-specific T cell clones (from n = 3 patients) were identified by their proliferative responses. 2/8 CD8+ and 7/11 CD4+C…
Urushiol	Kim, 2016	+	2 µg/ml	6.2 μM	K652 cells	Modification (pulsed APC)	PBMC	Cytokine production	Flow cytometry ELISA	CD45RO+ memory CD4+ T cells	Patient cohort: 6 urushiol-allergic (poison ivy dermatitis within 6 months before sample collection), 6 non-allergic	Increased IL-17 and IL-22 expression by urushiol-specific CD1a-restricted T cells in murine models and human ACD.
SMX/TMP	Kim, 2020	++	9.9 - 800 µg/mL 48 µg/mL	SMX: 39 μM - 3158 μM TMP: 34 - 2755 μM SMX: 189 μM TMP: 165 μM	PBMC	Direct administration	PBMC	Proliferation	LTT with CFSE	-	Patient cohort: 1 SMX/TMP-allergic (Drug-induced hypersensitivity syndrome/drug reaction with eosinophilia and systemic symptoms (DiHS/DRESS), 1 - 5 non-allergic	SMX/TNP-specific proliferative T cell response in patient PBMC compare to control PBMC. HLA-DR blocking antibodies inhibited T cell proliferation.
PPD	Kneilling, 2010	+++	78 - 10000 ng/ml	0.72 - 92.4 µM	PBMC	Direct administration	PBMC	Proliferation	Lymphocyte activation test (LAT) with thymidine in presence of IL-2	-	Patients cohort: 8 PPD-allergic (patch testing), 17 non-allergic	Increased T cell proliferation of PPD-stimulated PBMC from all allergic donors in the presence of IL-2. Without IL-2 addition, proliferation was detected in fewer PPD-allergic donors.
TCE	Li, 2019	+	0.06 - 0.25 mM	60 - 250 μM	PBMC	Direct administration	PBMC	Proliferation Intracellular free Ca2+ levels Cytokine production p38 and NFΚB phosphorylation	MTT ELISA Western Blot	naive T cells	Patient cohort: 30 TCE-occupational medicamentosa-like dermatitis patients , 58 TCE exposed, 40 non-exposed	Increased CD4+ T cell proliferation, increased intracellular free Ca2+, increased IL-2, IFN-γ, and TNF-α, increased phosphorylation levels of p38 MAPK and NF-κB in a dose-dependent manner only in patients in response to the TCE metabolite TCAH (trichloroacetaldehyde).
MCI/MI (Kathon CG)	Masjedi, 2003	++	proliferation: 0.0078 - 8 µg/ml cytokine secretion: 0.012, 0.047, 0.19, 0.75 µg/ml	proliferation: 0.03 - 30 µM cytokine secretion: 0.05, 0.2, 0.7, 3 µM	PBMC	Direct administration	PBMC	Proliferation Cytokine production	LTT with thymidine incorporation ELISA ELISpot	Th1, Th2 (indirectly)	Patient cohort: 10 MCI/MI-allergic, 9 non-allergic (patch testing) Sample uptake: before patch testing	Increased T cell proliferation in the allergic group. Cells from all individuals demonstrating a + + or + + + patch test reaction responded positively, whereas cells from the two + patch test individuals exhibited no significant cellular proliferative response. PBMC from allergic patients exposed to MCI/MI exhibited significant higher number of IL-12 and IL-13-producing cells. IL-13 production wa…
BB	Moed, 2005	+++	0.1 - 1 - 10 µg/ml	0.3 - 3.4 - 34 µM	PBMC	Direct administration Modification (pulsed APC)	PBMC	Proliferation Cytokine production (IFN-γ,IL-5)	LTT with thymidine incorporation ELISA	Th1, Th2 (indirectly)	Patient cohort: 7 PPD-allergic, 7 non-allergic (patch testing)	PPD and BB induced proliferation only in 1/6 allergic patient PBMC (both direct addiction and Ag-loaded PBMC). Addition of cytokine cocktails (IL-7 + IL-12 or IL-4) to the cultures enhanced allergen-specific T cell proliferation of allergic patients vs healthy donors. Increased allergen-induced IFN-γ and IL-5 production only in allergic patients. No significant allergen induced IFN-γ or IL-5 prod…
Fragrance mix	Moed, 2005	++	0.1 - 1 - 10 µg/ml		PBMC	Direct administration Modification (pulsed APC)	PBMC	Proliferation Cytokine production (IFN-γ, IL-5)	LTT with thymidine incorporation ELISA	Th1, Th2 (indirectly)	Patient cohort: 7 fragrance-mix-allergic, 7 non-allerigc (patch testing)	Increased T cell proliferation in the presence of cytokine cocktails (IL-7 + IL-12 or IL-4) of allergic patients vs healthy donors. Increased IFN-γ and IL-5 production in allergic patients, but not in the healthy donors with cytokine cocktails.
MCI	Moed, 2005	++	0.1 - 1 - 10 µg/ml	0.6 - 6 - 66 μM	PBMC	Direct administration Modification (pulsed APC)	PBMC	Proliferation Cytokine production (IFN-γ, IL-5)	LTT with thymidine incorporation ELISA	Th1, Th2 (indirectly)	Patient cohort: 7 MCI-allergic, 7 non-allergic (patch testing)	Increased T cell proliferation in the presence of cytokine cocktails (IL-7 + IL-12 or IL-4) of allergic patients vs healthy donors. Increased IFN-γ and IL-5 production in allergic patients, but not in the healthy donors with cytokine cocktails.
PPD	Moed, 2005	+++	0.1 - 1 - 10 µg/ml	0.9 - 9 - 90 μM	PBMC	Direct administration Modification (pulsed APC)	PBMC	Proliferation Cytokine production (IFN-γ, IL-5)	LTT with thymidine incorporation ELISA	Th1, Th2 (indirectly)	Patient cohort: 7 PPD-allergic, 7 non-allergic (patch testing)	PPD and BB induced proliferation only in 1/6 allergic patient PBMC (both direct addiction and Ag-loaded PBMC). Addition of cytokine cocktails (IL-7 + IL-12 or IL-4) to the cultures enhanced allergen-specific T cell proliferation of allergic patients vs healthy donors. Increased allergen-induced IFN-γ and IL-5 production only in allergic patients. No significant allergen induced IFN-γ or IL-5 prod…
DNCB	Newell, 2013	++	2 µM	2 µM	PBMC	Direct administration	PBMC	Cytokine production (IFN-γ, IL-4)	ELISpot Flow cytometry intracellular staining	Th1, Th2 (indirectly)	Patient cohort: 16 atopic and 10 non-atopic DNCB-sensitized, 6 non-sensitized	Equal basal IFN-γ and IL-4 production in AD patients vs healthy donors. After DNCB challenge (elicitation, 4 weeks after sensitization) AD patients showed reduced hypersensitivity responses to DNCB, reduced edema and erythema. In DNCB-derived T cell lines, cells were not able to simultaneosly produce IFN-γ and IL-4. Both groups exhibited Th1 responses (IFN-γ), and only cells from AD individuals w…
Balsam of Perú	Nicolai, 2020	++	0.1 - 1 - 10 - 50 µg/mL		CD1a transfected K562	Direct administration	PBMC-derived CD1a-reactive ab T cells lines (BC2, Bgp)	Cytokine production (IFN-γ)	ELISA	-	Healthy donors	Dose dependent secretion of IFN-γ by T cells upon chemical stimulation, no IFN-γ detected with a soaking method (patch test preparation soaked in media and removed).
Benzyl benzoate	Nicolai, 2020	++	0.1 - 100 µg/mL	0.4 - 471 μM	CD1a transfected K562	Direct administration	PBMC-derived CD1a-reactive ab T cells lines (BC2, Bgp)	Cytokine production (IFN-γ)	ELISA	-	Healthy donors	Dose dependent secretion of IFN-γ by T cells upon chemical stimulation, no IFN-γ detected with a soaking method (patch test preparation soaked in media and removed).
Benzyl cinnamate	Nicolai, 2020	++	0.1 - 100 µg/mL	0.4 - 419 μM	CD1a transfected K562	Direct administration	PBMC-derived CD1a-reactive ab T cells lines (BC2, Bgp)	Cytokine production (IFN-γ)	ELISA	-	Healthy donors	Dose dependent secretion of IFN-γ by T cells upon chemical stimulation, no IFN-γ detected with a soaking method (patch test preparation soaked in media and removed).
Coenzyme Q2	Nicolai, 2020	++	50 - 150 μM	50 - 150 μM	CD1a transfected K562	Direct administration	PBMC-derived CD1a-reactive ab T cells lines (BC2, Bgp)	Cytokine production (IFN-γ)	ELISA	-	Healthy donors	Dose dependent secretion of IFN-γ by T cells upon chemical stimulation, no IFN-γ detected with a soaking method (patch test preparation soaked in media and removed).
Farnesol	Nicolai, 2020	++	50 - 150 μM	50 - 150 μM	CD1a transfected K562	Direct administration	PBMC-derived CD1a-reactive ab T cells lines (BC2, Bgp)	Cytokine production (IFN-γ)	ELISA	-	Healthy donors	Dose dependent secretion of IFN-γ by T cells upon chemical stimulation, no IFN-γ detected with a soaking method (patch test preparation soaked in media and removed).
PPD	Oakes, 2017	+++	10 - 100 μg/ml	92.4 - 924 µM	PBMC	Protein conjugation (to HSA)	PBMC	Proliferation T cell phenotype TCR repertoire	LTT with thymidine incorporation Flow cytometry TCR sequencing	-	Patient cohort: 56 PPD-allergic (patch testing) Sample uptake: after patch testing	Changes in T cell phenotype, increased T cell proliferation and, among PPD- and PPD-HSA-specific T cell lines from one patient, expansion of TCRα and β clonotypes, associated with selective expansion of TCR with skewed V- and J-gene segment usage.
MI	Popple, 2016	+	0.001 - 100 µg/ml	0.009 - 8.8 μM	PBMC	Direct administration Protein conjugation (to HSA)	PBMC	Proliferation	LTT with thymidine incorporation Flow cytometry	CD4+, CD8+ T cells	Patient cohort: 56 MI allergic patch test donors (20 +, 29 ++ and 7 +++). Sample collection: 4 days after patch test	Increased T cell proliferation in 25% of allergic individuals (14/56). The magnitude of responses was unrelated to patch testing results. Trend were associated with CD4+ T lymphocyte proliferation in low (+) patch testing positive donors, whereas ++ and +++ donor responses were characterized by both CD4+ and CD8+ T lymphocyte activation comprising a larger percentage of proliferating CD8+ than of…
Azidamphenicol	Sachs, 2001	+	12.5 - 25 - 50 - 100 μg/ml 20 μg/ml	42 - 84 - 169 - 339 μM 67 μM	PBMC	Direct administration	PBMC	Proliferation	LTT with thymidine incorporation	-	Patient cohort: 2 Chloramphenicol/azidamphenicol-allergic (patch testing), 1 non-allergic	Increased T cell proliferation to chloramphenicol and azidamphenicol.
Chloramphenicol	Sachs, 2001	+	12.5 - 25 - 50 - 100 μg/ml 20 μg/ml	38 - 77 - 154 - 309 μM 62 μM	PBMC	Direct administration	PBMC	Proliferation	LTT with thymidine incorporation	-	Patient cohort: 2 Chloramphenicol/azidamphenicol-allergic (patch testing), 1 non-allergic	Increased T cell proliferation to chloramphenicol and azidamphenicol.
Benzyl cinnamate	Schutte, 2019	++	1 - 100 mM	1000 - 10000 μM	PBMC	Direct administration	PMBC	Proliferation Cytokine production (IFN-γ)	Cell counting kit 8 solution ELISpot	-	2 HLA-B*57:01+ and 2 HLA-B*5701- individuals	As predicted by modeled binding to HLA-B*57:01, increased T cell proliferation was observed in response to chemical stimualtion in the respective HLA-expression donors.
Benzyl salicylate	Schutte, 2019	+	1 - 100 mM	1000 - 10000 μM	PBMC	Direct administration	PBMC	Proliferation Cytokine production (IFN-γ)	Cell counting kit 8 solution ELISpot	-	2 HLA-B*57:01+ and 2 HLA-B*5701- individuals	As predicted by modeled binding to HLA-B*57:01, increased T cell proliferation was observed in response to chemical stimualtion in the respective HLA-expression donors.
Eugenol	Sieben, 2001	++	0.1 - 100 µg/ml	0.6 - 609 μM	PBMC EBV-transformed B cells	Direct administration Modification (pulsed APC, for T cell clones)	PBMC	Proliferation T cell clones Cytokine production Cytoxoxicity	LTT with thymidine incorporation Flow cytometry ELISA Cytotoxic assay	CD4+, CD8+ T cells	Patient cohort: 32 fragrance mix-allergic (patch testing , 1st with mix, 2nd after 4 weeks with all 8 individual components); 10.2% Eugenol-allergic Sample collection: 1-2 weeks after 2nd patch test	T cell proliferative respons to indivdiual fragrance mix I substances in allergic individuals. For eugenol, 18 specific T cell clones were generated, 83% were CD4+ , 17% were CD8+ T cells. All established clones produced Th1 cytokines, IL-2 and IFN-γ. Th2 cytokines IL-4 and IL-10 were virtually absent. Three investigated CD4+ t cell clones lysed eugenol-treated EBV-B cells while absence of eugeno…
Geraniol	Sieben, 2001	+	0.1 - 100 µg/ml	0.6 - 648 μM	PBMC EBV-transformed B cells	Direct administration	PBMC	Proliferation T cell clones Cytokine production Cytoxoxicity	LTT with thymidine incorporation Flow cytometry ELISA Cytotoxic assay	CD4+, CD8+ T cells	Patient cohort: 32 fragrance mix-allergic (patch testing , 1st with mix, 2nd after 4 weeks with all 8 individual components); at least 2 geraniol-allergic Sample collection: 1-2 weeks after 2nd patch test	T cell proliferative respons to indivdiual fragrance mix I substances in allergic individuals. For eugenol, 18 specific T cell clones were generated, 83% were CD4+ , 17% were CD8+ T cells. All established clones produced Th1 cytokines, IL-2 and IFN-γ. Th2 cytokines IL-4 and IL-10 were virtually absent. Three investigated CD4+ t cell clones lysed eugenol-treated EBV-B cells while absence of eugeno…
Hydroxycitronellal	Sieben, 2001	+	0.1 - 100 µg/ml	0.6 - 581 μM	PBMC EBV-transformed B cells	Direct administration	PBMC	Proliferation Cytokine production Cytoxoxicity	LTT with thymidine incorporation Flow cytometry ELISA Cytotoxic assay	CD4+, CD8+ T cells	Patient cohort: 32 fragrance mix-allergic (patch testing , 1st with mix, 2nd after 4 weeks with all 8 individual components); 12.2% hydrocycitronellal-allergic Sample collection: 1-2 weeks after 2nd patch test	T cell proliferative respons to indivdiual fragrance mix I substances in allergic individuals. For eugenol, 18 specific T cell clones were generated, 83% were CD4+ , 17% were CD8+ T cells. All established clones produced Th1 cytokines, IL-2 and IFN-γ. Th2 cytokines IL-4 and IL-10 were virtually absent. Three investigated CD4+ t cell clones lysed eugenol-treated EBV-B cells while absence of eugeno…
Isoeugenol	Sieben, 2001	+	0.1 - 100 µg/ml	0.6 - 609 μM	PBMC EBV-transformed B cells	Direct administration	PBMC	Proliferation Cytokine secretion Cytoxoxicity	LTT with thymidine incorporation Flow cytometry ELISA Cytotoxic assay	CD4+, CD8+ T cells	Patient cohort: 32 fragrance mix-allergic (patch testing , 1st with mix, 2nd after 4 weeks with all 8 individual components); 28.6% isoeugenol-allergic Sample collection: 1-2 weeks after 2nd patch test	T cell proliferative respons to indivdiual fragrance mix I substances in allergic individuals. For eugenol, 18 specific T cell clones were generated, 83% were CD4+ , 17% were CD8+ T cells. All established clones produced Th1 cytokines, IL-2 and IFN-γ. Th2 cytokines IL-4 and IL-10 were virtually absent. Three investigated CD4+ t cell clones lysed eugenol-treated EBV-B cells while absence of eugeno…
Oak moss	Sieben, 2001	+	0.1 - 100 µg/ml		PBMC EBV-transformed B cells	Direct administration	PBMC	Proliferation Cytokine secretion Cytoxoxicity	LTT with thymidine incorporation Flow cytometry ELISA Cytotoxic assay	CD4+, CD8+ T cells	Patient cohort: 32 fragrance mix-allergic (patch testing , 1st with mix, 2nd after 4 weeks with all 8 individual components); 24.5% oak moss-allergic Sample collection: 1-2 weeks after 2nd patch test	T cell proliferative respons to indivdiual fragrance mix I substances in allergic individuals. For eugenol, 18 specific T cell clones were generated, 83% were CD4+ , 17% were CD8+ T cells. All established clones produced Th1 cytokines, IL-2 and IFN-γ. Th2 cytokines IL-4 and IL-10 were virtually absent. Three investigated CD4+ t cell clones lysed eugenol-treated EBV-B cells while absence of eugeno…
BB	Sieben, 2002	+++	0.01 - 5 - 20 µg/ml	0.03 - 15.7 - 63 µM	PBMC	Direct administration Modification (pulsed APC)	PBMC	Proliferation T cell clones Cellular markers HLA blocking Cytokine production	LTT with thymidine incorporation Flow cytometry ELISA	CD4+, CD8+ T cells	Patient cohort: 11 PPD-allergic (positive patch test) and 8 healthy donors	PBMC of all patients showed a proliferative response upon incubation with PPD, BB, or both. Two patients reacted only to PPD, one reacted only to BB. 41/53 T cell clones from allergic indivdiuals showed similar proliferation rates to PPD and BB. 6/53 T cell clones (5 BB- and 1 PPD-specific) responded more strongly to BB than to PPD, and 6/53 T cell clones (3 BB and 3 PPD) showed higher proliferat…
PPD	Sieben, 2002	+++	0.01 - 5 µg/ml	0.092 - 46 µM	PBMC	Direct administration Modification (pulsed APC)	PBMC	Proliferation T cell clones Cellular markers HLA blocking Cytokine production	LTT with thymidine incorporation Flow cytometry ELISA	CD4+, CD8+ T cells	Patient cohort: 11 PPD-allergic (patch testing), 8 non-allergic	PBMC of all patients showed a proliferative response upon incubation with PPD, BB, or both. Two patients reacted only to PPD, one reacted only to BB. 41/53 T cell clones from allergic indivdiuals showed similar proliferation rates to PPD and BB. 6/53 T cell clones (5 BB- and 1 PPD-specific) responded more strongly to BB than to PPD, and 6/53 T cell clones (3 BB and 3 PPD) showed higher proliferat…
PPD	Skazik, 2008	+++	1 - 50 μM	1 - 50 μM	PBMC	Direct administration	PBMC T cell lines/clones	Proliferation TCR-Vb repertoire	LPT with thymidine incorporation Flow cytometry	-	Patients cohort: 13 PPD-allergic (patch testing)	Increased T cell proliferation after stimulation of PBMC and T cell clones or lines with PPD or some PPD metabolites Low cross-reactivity of PPD-specific T cell clones to some PPD metabolites. Restricted usage of Vb chains in CD4+ T cell clones, predominantly Vb16 (5/8 clones).
Clindamycin	Vílchez-Sánchez, 2020	+	0.01 - 250 μg/ml	0.02 - 588 μM	PBMC	Direct administration	PBMC	Proliferation	LTT with thymidine incorporation	-	Patient cohort: 2 suspected clindamycin-allergic, (patch testing with 1% clindamycin negative at 48 and 96 h), 4 non allergic Sample collection: 3 months after the skin reaction	In both patients, the result of the LTT was positive. No LTT response to clindamycin in four non-allergic donors to clindamycin.
Parthenolide	Wahlkvist, 2008	+	0.37 - 1.1 - 3.3 μmol/l	0.37 - 1.1 - 3.3 μM	PBMC	Direct administration	PBMC	Cytokine production	ELISpot	CD4+ or CD8+ depleted T cells	Patient cohort: 10 parthenolide-allergic (patch testing, strong n = 6, moderate n = 2, weak n = 2), 5 non-allergic (patch testing)	Increased number of cells producing IFN-γ, IL-2, IL-4, IL-5 and IL-13 in allergic but not in healthy donors. Based on cut-off definitions, all eight individuals with moderate or strong patch-test reactions responded to parthenolide by production of IFN-γ. Seven of these were also positive for IL-13 together with IL-2, IL-4 and ⁄or IL-5. In five subjects, all five cytokines were detected. Healthy …
PPD	Wicks, 2019	+++	0.01 - 1 μg/mL 10 - 100 µg/ml PPD-HSA	9.2 - 0.092 μM	PBMC	Direct administration Protein conjugation (to HSA)	PBMC	Proliferation T cell phenotype	LTT with thymidine incorporation Flow cytometry	naive, central memory, effector memory, EMRA CD4+/CD8+ T cells, Tregs	Patient cohort: 53 PPD-allergic (patch testing), 14 non-allergic (buffy coats) Sample uptake: after patch testing (some before)	Proliferation: Only PBMC from 5/12 +++ PPD allergic donors had a proliferative response over threshold upon PPD stimulation. Upon PPD-HSA stimulation, PBMC from all +++ and few +/++ allergic proliferate over the threshold. Tcell phenotype: trend of increased naive T cells proportion and reduced EMRA and effector memory CD4+ T cells. In CD8+ T cells of ++ and +++ PPD-allergic individuals, the tren…
